# Supplementary material
Source: PubMed Central journal article supplement (PMC6072611)
Supplement: NIHMS967459-supplement-1.pdf [file NIHMS967459-supplement-1.pdf]

Supplementary Fig.S1

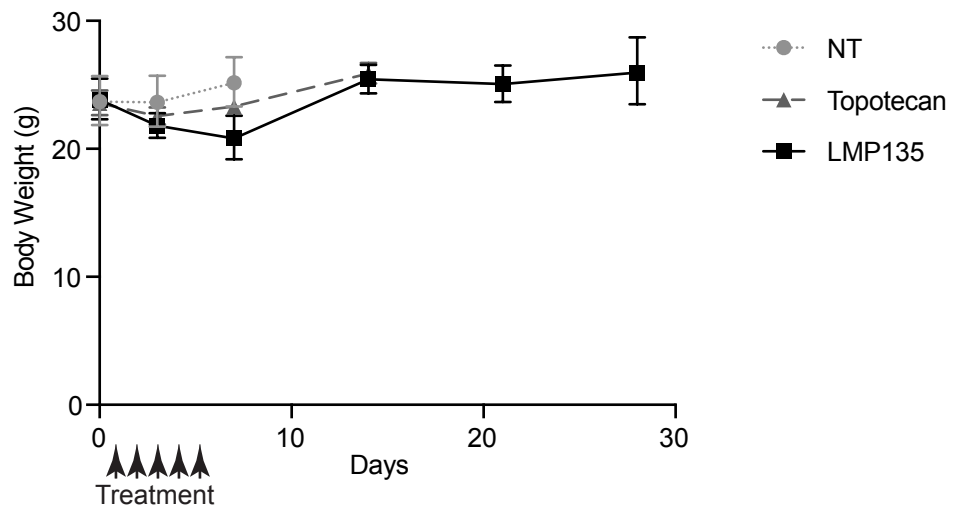

Figure S1: LMP135 induces marginal body weight loss in mice. Body weight was determined during and after treatment with Topotecan and LMP135.
